# Supplementary material for: The association between dietary inflammatory index and risk of central obesity in adults: An updated systematic review and meta-analysis
Source: Atypon-hosted journal article supplement (doi:10.1024/0300-9831/a000648), 2020-03-04
Supplement: 0300-9831_a000648_esm1.pdf [file 0300-9831_a000648_esm1.pdf]

# Electronic Supplementary Material 1

**Title: Dietary inflammatory index significantly increases the risk of central obesity in adults: An updated systematic review and meta-analysis**

**Authors: Mahdiah Abbasalizad Farhangi <sup>1,2\*</sup>, Mahdi Vajdi <sup>3</sup>**

<sup>1</sup> Nutrition Research Center, Tabriz University of Medical Sciences, Tabriz, Iran.

<sup>2</sup> Drug Applied Research Center, Tabriz University of Medical Sciences, Tabriz, Iran.

<sup>3</sup> Research Center for Evidence Based Medicine, Health Management and Safety Promotion Research Institute, Tabriz University of Medical Sciences, Tabriz, Iran.

**\* Corresponding author: Dr Mahdiah Abbasalizad Farhangi, Attar Neyshabouri, Daneshgah Blv, Tabriz, Iran. Email address: [abbasalizad\\_m@yahoo.com](mailto:abbasalizad_m@yahoo.com)**

**Running head:** Dietary inflammatory index, obesity

**PROSPERO registration number:** CRD42018110588

**Conflict of interest:** The authors declare that there is no financial or non-financial conflict of interest.

**Table E1.** PRISMA checklist for the current meta-analysis \*

| <b>Section/topic</b>      | <b>#</b> | <b>Checklist item</b>                                                                                                                                                                                                                                                                                       | <b>Reported on page #</b> |
|---------------------------|----------|-------------------------------------------------------------------------------------------------------------------------------------------------------------------------------------------------------------------------------------------------------------------------------------------------------------|---------------------------|
| <b>TITLE</b>              |          |                                                                                                                                                                                                                                                                                                             |                           |
| Title                     | 1        | Identify the report as a systematic review, meta-analysis, or both.                                                                                                                                                                                                                                         | Page: 1                   |
| <b>ABSTRACT</b>           |          |                                                                                                                                                                                                                                                                                                             |                           |
| Structured summary        | 2        | Provide a structured summary including, as applicable: background; objectives; data sources; study eligibility criteria, participants, and interventions; study appraisal and synthesis methods; results; limitations; conclusions and implications of key findings; systematic review registration number. | Page: 2                   |
| <b>INTRODUCTION</b>       |          |                                                                                                                                                                                                                                                                                                             |                           |
| Rationale                 | 3        | Describe the rationale for the review in the context of what is already known.                                                                                                                                                                                                                              | Page: 2,3                 |
| Objectives                | 4        | Provide an explicit statement of questions being addressed with reference to participants, interventions, comparisons, outcomes, and study design (PICOS).                                                                                                                                                  | Page: 4, line: 81-82      |
| <b>METHODS</b>            |          |                                                                                                                                                                                                                                                                                                             |                           |
| Protocol and registration | 5        | Indicate if a review protocol exists, if and where it can be accessed (e.g., Web address), and, if available, provide registration information including registration number.                                                                                                                               | Page: 1                   |
| Eligibility criteria      | 6        | Specify study characteristics (e.g., PICOS, length of follow-up) and report characteristics (e.g., years considered, language, publication status) used as criteria for eligibility, giving rationale.                                                                                                      | Page:4, 5 lines: 92-113   |
| Information sources       | 7        | Describe all information sources (e.g., databases with dates of coverage, contact with study authors to identify additional studies) in the search and date last searched.                                                                                                                                  | Page: 4, 100-104          |
| Search                    | 8        | Present full electronic search strategy for at least one database, including any limits used, such that it could be repeated.                                                                                                                                                                               | Page: 4; lines: 84-91     |
| Study selection           | 9        | State the process for selecting studies (i.e., screening, eligibility, included in systematic review, and, if applicable, included in the meta-analysis).                                                                                                                                                   | Page: 6; lines 140-146    |
| Data collection process   | 10       | Describe method of data extraction from reports (e.g., piloted forms, independently, in duplicate) and any processes for obtaining and confirming data from investigators.                                                                                                                                  | Page: 5 lines 117-125     |
| Data items                | 11       | List and define all variables for which data were sought (e.g., PICOS, funding sources) and any assumptions and simplifications made.                                                                                                                                                                       | Page: 5 lines 117-125     |

|                                    |    |                                                                                                                                                                                                                        |                             |
|------------------------------------|----|------------------------------------------------------------------------------------------------------------------------------------------------------------------------------------------------------------------------|-----------------------------|
| Risk of bias in individual studies | 12 | Describe methods used for assessing risk of bias of individual studies (including specification of whether this was done at the study or outcome level), and how this information is to be used in any data synthesis. | Page: 5, lines: 113-117     |
| Summary measures                   | 13 | State the principal summary measures (e.g., risk ratio, difference in means).                                                                                                                                          | Page: 5, 6 lines: 123-137   |
| Synthesis of results               | 14 | Describe the methods of handling data and combining results of studies, if done, including measures of consistency (e.g., $I^2$ ) for each meta-analysis.                                                              | Page: 5, 6 lines: 123-137   |
| Risk of bias across studies        | 15 | Specify any assessment of risk of bias that may affect the cumulative evidence (e.g., publication bias, selective reporting within studies).                                                                           | Page: 5, 6 lines: 123-137   |
| Additional analyses                | 16 | Describe methods of additional analyses (e.g., sensitivity or subgroup analyses, meta-regression), if done, indicating which were pre-specified.                                                                       | Page: 5, 6 lines: 123-137   |
| <b>RESULTS</b>                     |    |                                                                                                                                                                                                                        |                             |
| Study selection                    | 17 | Give numbers of studies screened, assessed for eligibility, and included in the review, with reasons for exclusions at each stage, ideally with a flow diagram.                                                        | Page: 6 lines: 139-148      |
| Study characteristics              | 18 | For each study, present characteristics for which data were extracted (e.g., study size, PICOS, follow-up period) and provide the citations.                                                                           | Page: 6, 7; lines: 149-175. |
| Risk of bias within studies        | 19 | Present data on risk of bias of each study and, if available, any outcome level assessment (see item 12).                                                                                                              | Page: 7-10; lines: 176-249  |
| Results of individual studies      | 20 | For all outcomes considered (benefits or harms), present, for each study: (a) simple summary data for each intervention group (b) effect estimates and confidence intervals, ideally with a forest plot.               | Page: 7-10; lines: 176-249  |
| Synthesis of results               | 21 | Present results of each meta-analysis done, including confidence intervals and measures of consistency.                                                                                                                | Page: 7-10; lines: 176-249  |
| Risk of bias across studies        | 22 | Present results of any assessment of risk of bias across studies (see Item 15).                                                                                                                                        | Page: 7-10; lines: 176-249  |
| Additional analysis                | 23 | Give results of additional analyses, if done (e.g., sensitivity or subgroup analyses, meta-regression [see Item 16]).                                                                                                  | Page: 7-10; lines: 176-     |

|                     |    |                                                                                                                                                                                      |                                 |
|---------------------|----|--------------------------------------------------------------------------------------------------------------------------------------------------------------------------------------|---------------------------------|
|                     |    |                                                                                                                                                                                      | 249                             |
| <b>DISCUSSION</b>   |    |                                                                                                                                                                                      |                                 |
| Summary of evidence | 24 | Summarize the main findings including the strength of evidence for each main outcome; consider their relevance to key groups (e.g., healthcare providers, users, and policy makers). | Page:10-12                      |
| Limitations         | 25 | Discuss limitations at study and outcome level (e.g., risk of bias), and at review-level (e.g., incomplete retrieval of identified research, reporting bias).                        | Page:12;<br>lines: 291-<br>299  |
| Conclusions         | 26 | Provide a general interpretation of the results in the context of other evidence, and implications for future research.                                                              | Page: 12;<br>lines: 299-<br>302 |
| <b>FUNDING</b>      |    |                                                                                                                                                                                      |                                 |
| Funding             | 27 | Describe sources of funding for the systematic review and other support (e.g., supply of data); role of funders for the systematic review.                                           | Page:12 line:<br>307            |

\*Moher D, Liberati A, Tetzlaff J, Altman DG. The PRISMA Group (2009). Preferred Reporting Items for Systematic Reviews and Meta-Analyses: The PRISMA Statement. PLoS Med 6 (7): e1000097.

**Table E2.** Search strategy and number of publications in each electronic database

| Data base | Search strategy                                                                                                                                                                                                                                                                                                                                                                                                                                                                                                                                                                                                                                                                               |
|-----------|-----------------------------------------------------------------------------------------------------------------------------------------------------------------------------------------------------------------------------------------------------------------------------------------------------------------------------------------------------------------------------------------------------------------------------------------------------------------------------------------------------------------------------------------------------------------------------------------------------------------------------------------------------------------------------------------------|
| PubMed    | (obesity[MeSH Terms]) OR body mass index[MeSH Terms]) OR BMI[Title/Abstract]) OR waist circumference[Title/Abstract]) OR waist to hip ratio[Title/Abstract]) OR weight[MeSH Terms]) OR adiposity[Title/Abstract]) OR cholesterol[MeSH Terms]) OR LDL, cholesterol[MeSH Terms]) OR HDL, cholesterol[MeSH Terms]) OR VLDL, cholesterol[MeSH Terms]) OR triglycerides[MeSH Terms]) OR triglyceride [Title/Abstract]) OR TG[Title/Abstract]) OR TC[Title/Abstract]) OR VLDL[Title/Abstract]) OR HDL[Title/Abstract] OR LDL [Title/Abstract]) AND dietary inflammatory index[Title/Abstract]) OR dietray inflammatory potential[Title/Abstract]) OR DII[Title/Abstract]) OR DIP [Title/Abstract]). |

**Table E3.** The PICO criteria used for the present systematic review

| <b>PICO criteria</b>     | <b>Description</b>                                                               |
|--------------------------|----------------------------------------------------------------------------------|
| Participants             | General adult population                                                         |
| Exposure (Interventions) | Highest category of dietary inflammatory index by higher scores of DII®          |
| Comparisons              | Lowest category of dietary inflammatory index by lower scores of DII®            |
| Outcome                  | Higher central obesity                                                           |
| Study design             | Observational studies with the design of cross-sectional, case control or cohort |

**Table E4.** Results of subgroup analyses of the association between OR's of WC and DII according to study and participants' characteristics

| <b>Group</b>              | <b>No. of studies</b> | <b>OR (95% CI)</b>   | <b>P<sub>within group</sub></b> | <b>P<sub>between group</sub></b> | <b>P<sub>heterogeneity</sub></b> | <b>I<sup>2</sup>, %</b> |
|---------------------------|-----------------------|----------------------|---------------------------------|----------------------------------|----------------------------------|-------------------------|
| <b>Total</b>              | 10                    | 1.162 (0.95-1.43)    | 0.154                           |                                  | 0.001                            | 68.1                    |
| <b>Continent</b>          |                       |                      |                                 |                                  |                                  |                         |
| <i>USA</i>                | 2                     | 0.999 (0.788, 1.267) | 0.996                           | 0.004                            | 0.094                            | 49.5                    |
| <i>Asia</i>               | 6                     | 0.983 (0.817, 1.183) | 0.857                           |                                  | 0.268                            | 22.1                    |
| <i>Europe</i>             | 2                     | 2.531 (1.715, 3.735) | <0.001                          |                                  | 0.336                            | 0.0                     |
| <b>Country</b>            |                       |                      |                                 |                                  |                                  |                         |
| <i>Luxembourg</i>         | 1                     | 1.120 (0.807, 1.554) | 0.498                           | <0.001                           | -                                | -                       |
| <i>China</i>              | 1                     | 0.930 (0.813, 1.064) | 0.290                           |                                  | -                                | -                       |
| <i>Iran</i>               | 2                     | 0.699 (0.365, 1.338) | 0.279                           |                                  | 0.374                            | 0                       |
| <i>Korea</i>              | 1                     | 1.217 (0.929, 1.592) | 0.154                           |                                  | 0.40                             | 0                       |
| <i>Lebanon</i>            | 1                     | 0.660 (0.292, 1.491) | 0.318                           |                                  | -                                | -                       |
| <i>USA</i>                | 2                     | 0.975 (0.723, 1.314) | 0.866                           |                                  | 0.078                            | 56.1                    |
| <i>Spain</i>              | 2                     | 2.531 (1.715, 3.735) | <0.001                          |                                  | 0.336                            | 0                       |
| <b>Dietary assessment</b> |                       |                      |                                 |                                  |                                  |                         |
| FFQ                       | 8                     | 1.098 (0.811, 1.487) | 0.546                           | 0.028                            | 0.001                            | 72.9                    |
| 24h-Recall                | 2                     | 1.050 (0.838, 1.315) | 0.672                           |                                  | 0.152                            | 46.9                    |
| <b>Sample size</b>        |                       |                      |                                 |                                  |                                  |                         |
| 1500 >                    | 4                     | 1.030 (0.77, 1.376)  | 0.840                           | 0.432                            | 0.214                            | 29.5                    |
| 1500 <                    | 5                     | 1.168 (0.886, 1.539) | 0.27                            |                                  | <0.001                           | 80.2                    |
| <b>Gender</b>             |                       |                      |                                 |                                  |                                  |                         |
| Male                      | 2                     | 1.334 (0.972, 1.831) | 0.074                           | 0.003                            | 0.326                            | 10.8                    |
| Female                    | 2                     | 1.473 (0.785, 2.764) | 0.228                           |                                  | <0.001                           | 87.8                    |
| Both gender               | 6                     | 0.910 (0.817, 1.014) | 0.088                           |                                  | 0.571                            | 0                       |

**Table E5.** Results of subgroup analyses of the association between mean of WC in different DII categories according to study and participants' characteristics

| <b>Group</b>              | <b>No. of studies</b> | <b>WMD (95% CI)</b>    | <b>P<sub>within group</sub></b> | <b>P<sub>between group</sub></b> | <b>P<sub>heterogeneity</sub></b> | <b>I<sup>2</sup>, %</b> |
|---------------------------|-----------------------|------------------------|---------------------------------|----------------------------------|----------------------------------|-------------------------|
| <b>Total</b>              | 22                    | 1.813 (0.785, 2.841)   | 0.001                           |                                  | <0.001                           | 98.2                    |
| <b>Country</b>            |                       |                        |                                 | <0.001                           |                                  |                         |
| <i>Australia</i>          | 1                     | 2.60 (-4.753, 9.953)   | 0.488                           |                                  | 0                                | 0                       |
| <i>Colombia</i>           | 1                     | 2.40 (-3.470, 8.270)   | 0.42                            |                                  | 0                                | 0                       |
| <i>Indonesia</i>          | 1                     | -0.80 (-3.582, 1.982)  | 0.57                            |                                  | 0.095                            | 64                      |
| <i>South Africa</i>       | 1                     | -4.10 (-7.807, -0.393) | 0.03                            |                                  | 0                                | 0                       |
| <i>China</i>              | 1                     | 4.40 (4.390, 4.410)    | <0.001                          |                                  | 0                                | 0                       |
| <i>Ireland</i>            | 1                     | 2.84 (2.804, 2.876)    | <0.001                          |                                  | 0                                | 0                       |
| <i>Spain</i>              | 1                     | 2.371 (1.537, 3.205)   | <0.001                          |                                  | 0.49                             | 0                       |
| <i>Pakistan</i>           | 1                     | 12.25 (10.904, 13.596) | <0.001                          |                                  | 0                                | 0                       |
| <i>Iran</i>               | 5                     | -1.895 (-5.959, 2.169) | 0.36                            |                                  | 0.1                              | 63.1                    |
| Luxembourg                | 1                     | -2.50 (-2.587, -2.413) | <0.001                          |                                  | 0                                | 0                       |
| USA                       | 5                     | 0.759 (-1.970, 3.488)  | 0.58                            |                                  | <0.001                           | 93.7                    |
| Turkey                    | 1                     | -0.095 (-0.513, 0.323) | 0.605                           |                                  | 0                                | 0                       |
| Sweden                    | 1                     | 0.188 (-0.266, 0.642)  | 0.416                           |                                  | 0                                | 0                       |
| Korea                     | 1                     | 1.157 (0.145, 2.169)   | <0.001                          |                                  | 0                                | 0                       |
| <b>Continent</b>          |                       |                        |                                 | <0.001                           |                                  |                         |
| <i>USA</i>                | 5                     | 0.944 (-1.58, 3.47)    | 0.46                            |                                  | <0.001                           | 91.7                    |
| <i>Europa/Australia</i>   | 8                     | 1.019 (-2.17, 4.21)    | 0.53                            |                                  | <0.001                           | 100                     |
| <i>Asia</i>               | 8                     | 3.38 (-1.912, 8.67)    | 0.21                            |                                  | <0.001                           | 98.1                    |
| <i>Africa</i>             | 1                     | -4.10 (-7.81, -0.39)   | 0.03                            |                                  | -                                | -                       |
| <b>Dietary assessment</b> |                       |                        |                                 | <0.001                           |                                  |                         |
| FFQ                       | 12                    | 0.60 (-0.933, 2.134)   | <0.001                          |                                  | <0.001                           | 100                     |
| 24h-Recall                | 6                     | 3.495 (-1.170, 8.160)  | <0.001                          |                                  | <0.001                           | 99.9                    |
| 3 day food dairy          | 4                     | -0.20 (-6.402, 6.002)  | 0.95                            |                                  | -                                | -                       |
| <b>Sample size</b>        |                       |                        |                                 | <0.001                           |                                  |                         |
| <1000                     | 13                    | 0.394 (-5.189, 5.977)  | 0.89                            |                                  | <0.001                           | 98.5                    |
| 1000-10000                | 7                     | 1.352 (-0.15, 2.857)   | 0.078                           |                                  | <0.001                           | 92.8                    |
| >15000                    | 2                     | 4.198 (3.576, 4.820)   | <0.001                          |                                  | <0.001                           | 57.7                    |
| <b>Gender</b>             |                       |                        |                                 | <0.001                           |                                  |                         |
| Male                      | 3                     | 5.847 (-2.477, 14.171) | 0.17                            |                                  | <0.001                           | 98.2                    |



|             |    |                        |      |        |      |
|-------------|----|------------------------|------|--------|------|
| Female      | 2  | -0.505 (-7.053, 6.043) | 0.88 | 0.001  | 91.4 |
| Both gender | 17 | 0.624 (-0.834, 2.082)  | 0.40 | <0.001 | 100  |

**Table E6.** Results of subgroup analyses of the association between mean of WHR in different DII categories according to study and participants' characteristics.

| Group                     | No. of studies | WMD (95% CI)           | P within group | P between group | P heterogeneity | I <sup>2</sup> , % |
|---------------------------|----------------|------------------------|----------------|-----------------|-----------------|--------------------|
| <b>Total</b>              | 9              | -0.005 (-0.038, 0.027) | 0.751          |                 | <0.001          | 86.9               |
| <b>Country</b>            |                |                        |                | <0.001          |                 |                    |
| <i>South Africa</i>       | 1              | 0.000 (-0.029, 0.029)  | 1              |                 | -               | -                  |
| <i>Spain</i>              | 2              | 0.010 (-0.002, 0.022)  | 0.098          |                 | <0.001          | 88.5               |
| <i>Pakistan</i>           | 1              | 0.060 (0.040, 0.080)   | <0.001         |                 | -               | -                  |
| <i>Iran</i>               | 3              | 0.000 (-0.013, 0.013)  | 1              |                 | -               | -                  |
| <i>USA</i>                | 2              | 0.020 (0.001, 0.039)   | 0.038          |                 | -               | -                  |
| <b>Continent</b>          |                |                        |                | <0.001          |                 |                    |
| <i>Africa</i>             | 1              | 0.000 (-0.029, 0.029)  | 1              |                 | -               | -                  |
| <i>USA</i>                | 1              | 0.020 (0.001, 0.039)   | 0.036          |                 | -               | -                  |
| <i>Europe</i>             | 2              | 0.010 (-0.002, 0.022)  | 0.098          |                 | <0.001          | 88.5               |
| <i>Asia</i>               | 5              | 0.029 (-0.029, 0.088)  | 0.32           |                 | <0.001          | 96                 |
| <b>Dietary assessment</b> |                |                        |                | <0.001          |                 |                    |
| FFQ                       | 6              | 0.007 (-0.002, 0.017)  | 0.006          |                 | 0.004           | 87.9               |
| 24h-Recall                | 3              | 0.040 (0.001, 0.079)   | <0.127         |                 | 0.001           | 79.9               |
| <b>Sample size</b>        |                |                        |                | 0.115           |                 |                    |
| <1500                     | 5              | 0.020 (-0.008, 0.048)  | 0.159          |                 | <0.001          | 88.7               |
| >1500                     | 4              | 0.010 (-0.002, 0.022)  | 0.098          |                 | <0.001          | 88.5               |
| <b>Gender</b>             |                |                        |                | <0.001          |                 |                    |
| Male                      | 2              | 0.034 (-0.015, 0.083)  | 0.172          |                 | <0.001          | 95.3               |
| Female                    | 2              | 0.015 (-0.002, 0.032)  | 0.081          |                 | 0.183           | 43.6               |
| Both gender               | 5              | 0.004 (-0.006, 0.013)  | 0.448          |                 | 0.139           | 49.4               |

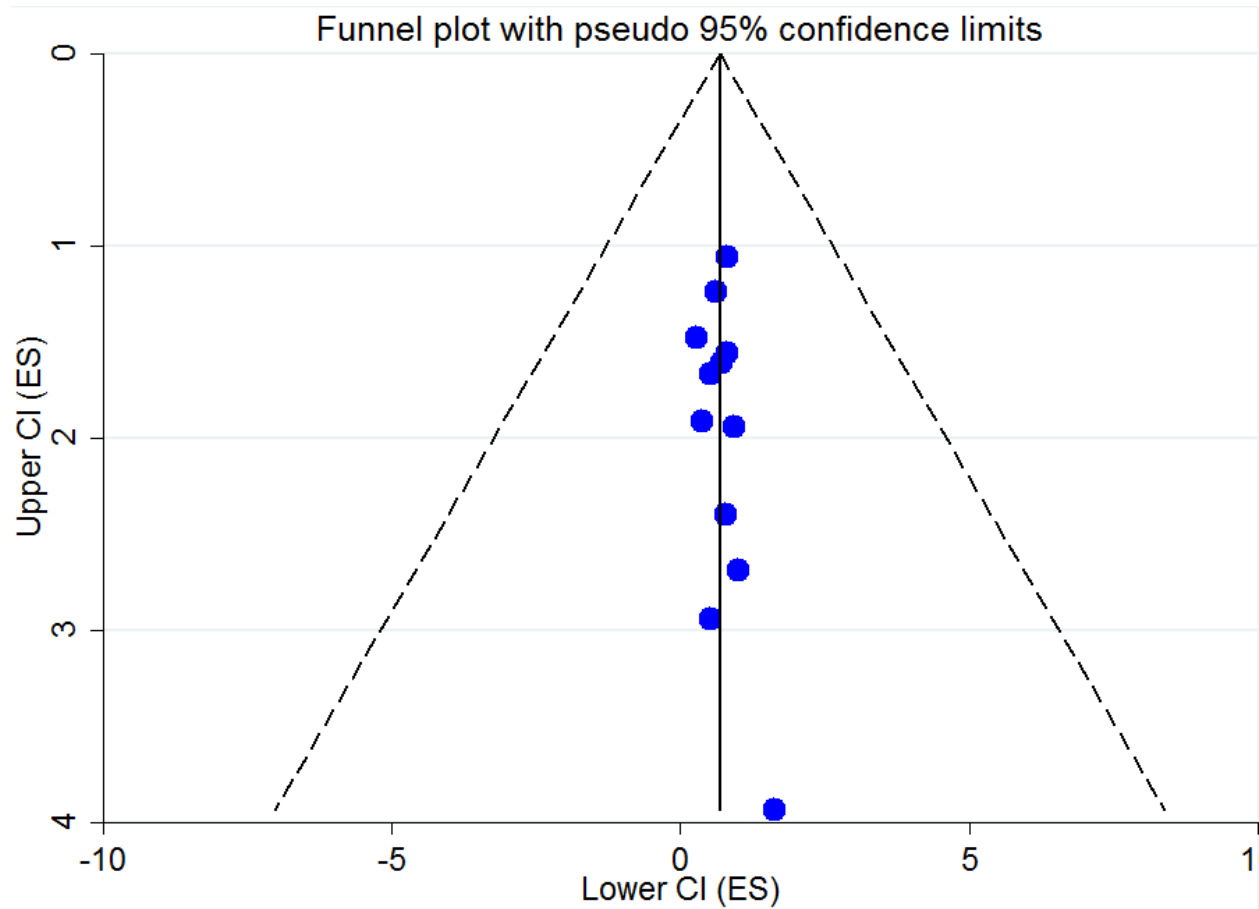

**Figure E1.** Begg's funnel plots (with pseudo 95% CIs) of the lower CI (ES) versus the upper CI (ES) of the OR for studies evaluating the association between WC and DII. (The results of Egger's test did not show evidence of publication bias Egger's test  $P = 0.359$ )

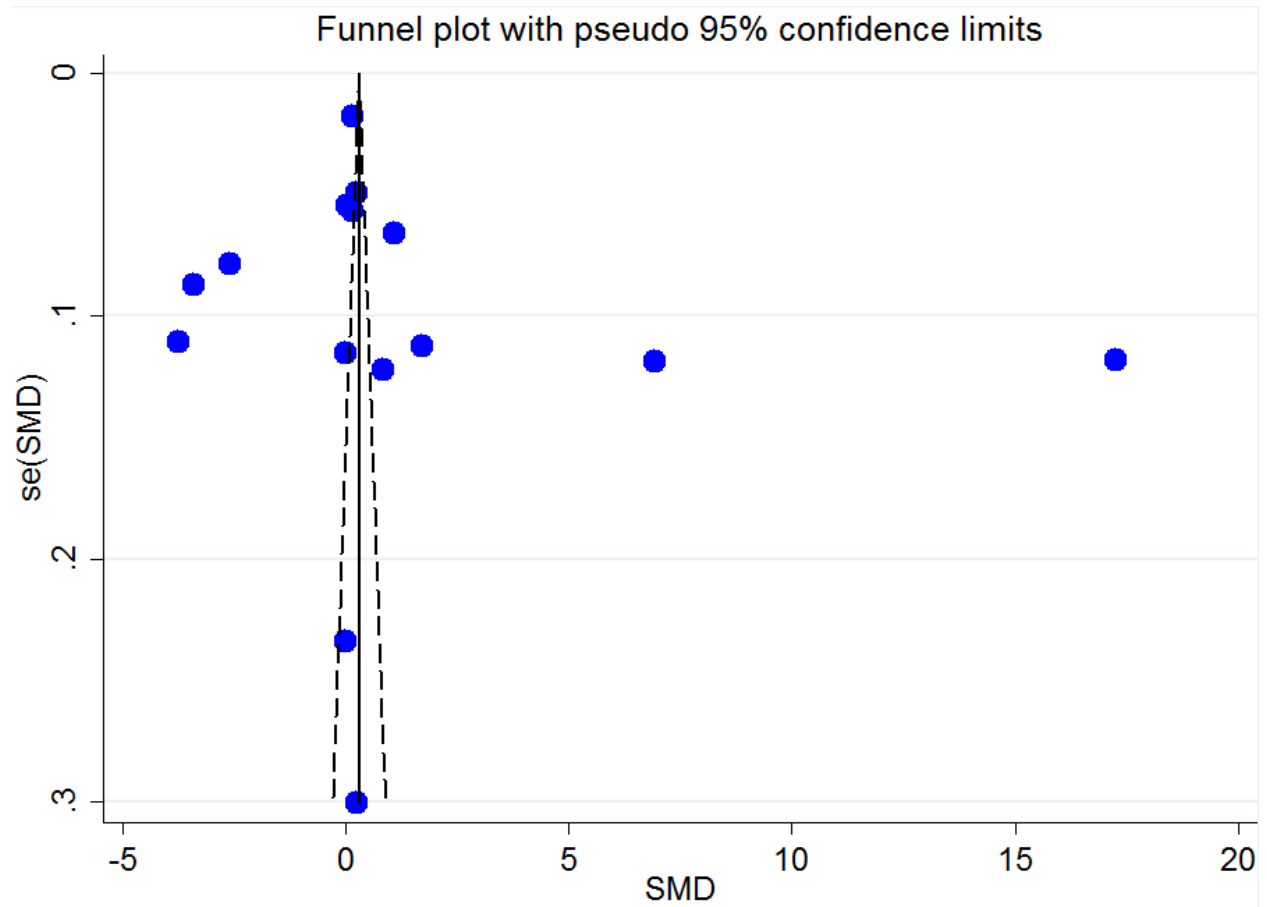

**Figure E2.** Begg's funnel plots (with pseudo 95% CIs) of the SMD versus the se (SMD) of the mean difference of WC for studies evaluating the association between WC and DII. (The results of eggers test did not show evidence of publication bias Egger's test  $P = 0.459$ ).

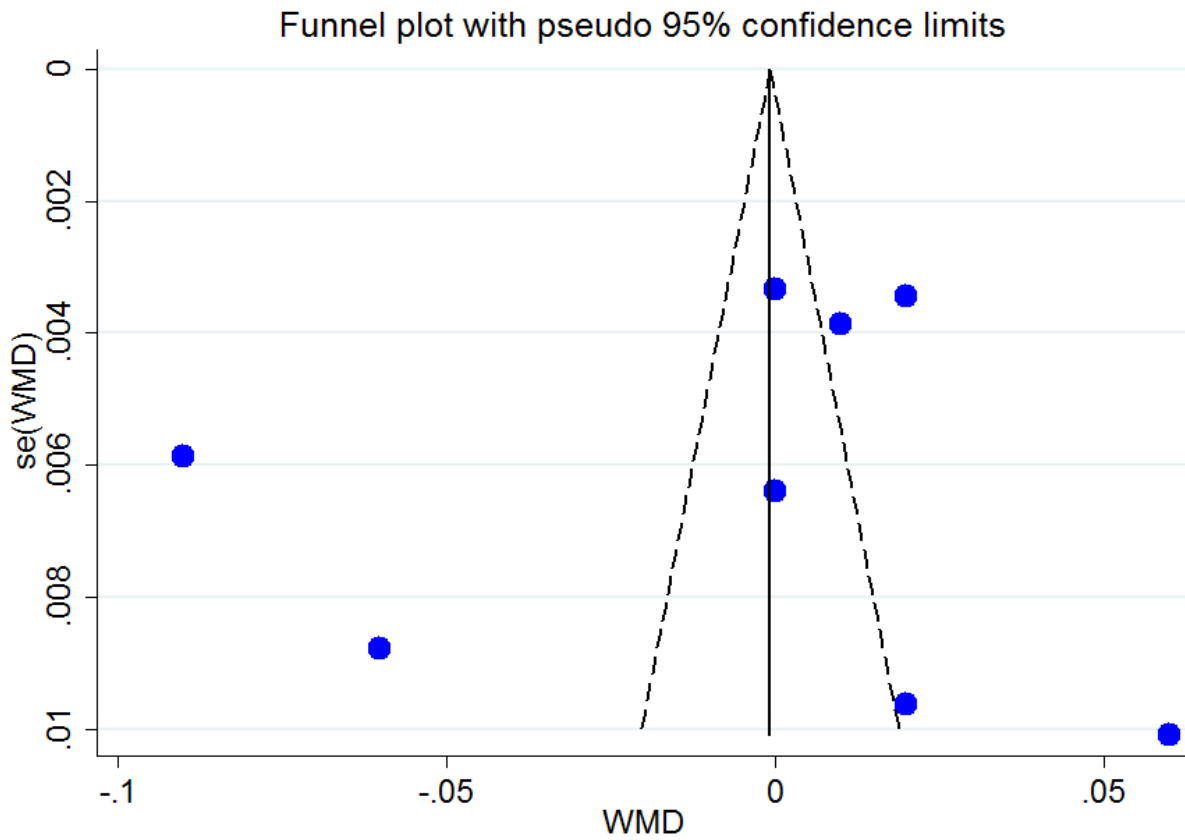

**Figure E3.** Begg's funnel plots (with pseudo 95% CIs) of the SMD versus the se (SMD) of the mean difference of WHR for studies evaluating the association between WHR and DII. (The results of eggers test did not show evidence of publication bias Egger's test  $P = 0.593$ ).
